# Supplementary material for: Seed Biologists Beware: Estimates of Initial Viability Based on Ungerminated Seeds at the End of an Experiment May Be Error-Prone
Source: Preprints.org preprint supplement (doi:10.20944/preprints202109.0256.v3), 2021-11-17
Supplement: Supplementary file 1 [file supplementary]

**Table 1.** Examples of studies that used assessment of seed viability and germination at the end of the experiment to estimate initial viability.

| Species tested                                                                         | Method of determining initial viability from end-of-experiment data                                                                                                                          | Experimental conditions                                                           | Differing initial viability between treatments                 | Reference                    |
|----------------------------------------------------------------------------------------|----------------------------------------------------------------------------------------------------------------------------------------------------------------------------------------------|-----------------------------------------------------------------------------------|----------------------------------------------------------------|------------------------------|
| 21 woody native species of Chilean matorral                                            | Viability calculated as: those germinated during the monitoring period plus non-germinated seeds identified as viable by tetrazolium test                                                    | Moist absorbent paper in petri dishes at 20/10°C with 12/12 h light/dark for 36 d | Yes (3 species), but data not adjusted for viability           | Gómez-González et al. (2017) |
| 13 native and one introduced species ( <i>Acacia saligna</i> ) of South African fynbos | Viability determined as the sum of germinated seeds and seeds appearing fresh on dissection of ungerminated seeds                                                                            | 1% water agar at 10/20°C with a 12 h light and dark cycle for 91 d                | Yes (at least 2 species)                                       | Hall et al. (2017)           |
| 65 species commonly occurring on New England tableland (NSW Australia)                 | Seeds that did not germinate, but looked viable, were analysed using tetrazolium test. Viability based on treatment with highest germination plus any seeds that remained dormant but viable | Moist pad in dish at 25/15°C with a 12/12 h light/dark for 28 or 56 d             | Probably (as used highest viability levels between treatments) | Clarke et al. (2000)         |
| <i>Asterolasia buxifolia</i> , riparian habitat of SE Australia                        | Embryo dissected from 20 seeds that did not germinate and viability confirmed if embryo and endosperm intact                                                                                 | Moist filter paper in petri dishes at 11/3°C with 12/12 h in light/dark for 77 d  | Data not adjusted for viability*                               | Collette and Ooi (2017)      |
| 33 herb and small shrub species in fire-prone Turkey                                   | Embryo of seeds that did not germinate examined and viability confirmed if embryo intact                                                                                                     | 0.8% agar in Petri dishes at 20°C in dark for 35 d                                | Data adjusted for viability                                    | Serter Çatav et al. (2017)   |
| 46 legumes species of tropical savanna, Brazil                                         | Initial viability equals the sum of germinated and dormant seeds in control                                                                                                                  | Moist filter paper in petri dishes at 27°C with 12/12 h light/dark for 28 d       | No data given at treatment level                               | Daibes et al. (2019)         |
| 13 species of West African                                                             | Cut test – condition of embryo,                                                                                                                                                              | Moist filter paper in bell jars at 25°C light                                     | No data given at                                               | Dayamba et                   |

|                                                             |                                                                                                                           |                                                                                       |                                  |                         |
|-------------------------------------------------------------|---------------------------------------------------------------------------------------------------------------------------|---------------------------------------------------------------------------------------|----------------------------------|-------------------------|
| of grasslands and woodlands of SE Australia                 | seeds post-trial                                                                                                          | light/dark for 56 d                                                                   | treatment level                  | al. (2019)              |
| 2 alien and 2 indigenous legume species in S African fynbos | Germination level of scarified seeds conducted at same time as other treatments                                           | 0.02% benomyl solution in petri dishes at 20°C with 12/12 h light/dark for 30 or 60 d | No data given at treatment level | Jeffery et al. (1988)   |
| 3 species of <i>Acronychia</i> in E Australian rainforest   | Ungerminated seeds checked for firmness by pressing seed with forceps. Then firm seeds checked for viability via cut test | 0.8% water agar in petri dishes at 25/10°C with a 12/12 h light/dark for 28 d         | No data given at treatment level | Liyange et al. (2020)   |
| 9 herbaceous species in Brazilian grassland                 | Tetrazolium test on ungerminated seeds                                                                                    | Moist filter paper in petri dishes at 20°C or 25°C at 16/8 h in light/dark for 21 d   | No data given at treatment level | Overbeck et al. (2005)  |
| <i>Brassica napus</i>                                       | Cotyledon condition of ungerminated seeds post-trial. Necrotic cotyledons = nonviable, yellow-milky cotyledons = viable   | Moist filter paper in petri dishes at 20°C in dark for 35 d                           | No                               | Shayanfar et al. (2020) |

\*Viability 80% at 100°C but only 65% at the lower temperature of 80°C appears anomalous and might indicate an unexpected treatment effect on viability (they should have been the same or the reverse if there was a heat effect on viability) but no statistical analyses were undertaken
